# Supplementary material for: Gold(iii) enhanced chemiluminescence immunoassay for detection of antibody against ApxIV of Actinobacillus pleuropneumoniae
Source: Royal Society of Chemistry journal article supplement (doi:10.1039/b715476c), 2008-01-01
Supplement: b715476c.pdf [file b715476c.pdf]

Electronic Supporting Information

for

Gold(III) enhanced chemiluminescence immunoassay for detection of antibody against ApxIV of

*Actinobacillus pleuropneumoniae*

Dehong Hu<sup>1</sup>, Heyou Han<sup>\*1</sup>, Rui Zhou<sup>2</sup>, Fei Dong<sup>1</sup>, Weicheng Bei<sup>2</sup>, Fan Jia<sup>2</sup> and Huanchun Chen<sup>2</sup>

<sup>1</sup>College of Science, State Key Laboratory of Agricultural Microbiology, Huazhong Agricultural University, Wuhan 430070, China. <sup>2</sup>Division of Animal Infectious Disease in the State Key Laboratory of Agricultural Microbiology, College of Veterinary Medicine, Huazhong Agricultural University, Wuhan 430070, China.

<sup>1</sup>E-mail: [hyhan@mail.hzau.edu.cn](mailto:hyhan@mail.hzau.edu.cn)

The Choice of Dissolve Acid

The CLIA is based on the enhancement of  $\text{AuCl}_4^-$  for the luminol-NaOH system. Therefore, it is the primary step to dissolve the gold nanoparticles from the gold nanoparticle-Rabbit anti-Pig IgG conjugate to  $\text{AuCl}_4^-$ . This was achieved with the use of HCl-NaCl- $\text{Br}_2$  solution, which was proved to be more efficient than other solution, such as  $\text{HNO}_3$ -HCl solution, NaCl- $\text{Br}_2$  solution and HCl-NaCl solution, and so on.

The conditions of gold dissolution with the use of HCl- $\text{HNO}_3$  have been studied, which is shown in Fig.S1 and Fig.S2. As the concentration of HCl increased, the signal/noise ratio increased between 0.25 M and 3 M, and then decreased in the range of 3 to 6 M HCl (Fig.S1). Hence, subsequent work employed 3 M HCl. Second, the signal/noise ratio increased when the concentration of  $\text{HNO}_3$  was increased from 0.33 to 1 M, and then decreased quickly (Fig.S5). Thus, 1 M  $\text{HNO}_3$  was selected for the following experiments.

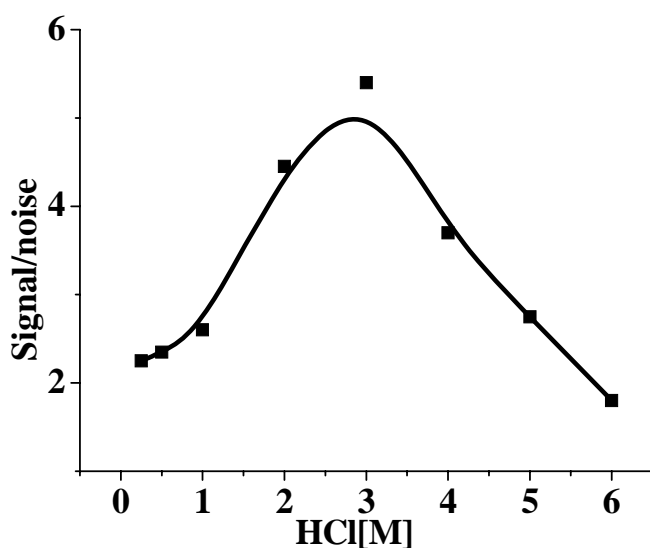

Fig.S1. Signal/noise ratio vs the concentration of HCl. Experimental conditions: 50  $\mu$ L of  $2.32 \times 10^{-9}$  M gold nanoparticles (15 nm) was dissolved in 50  $\mu$ L of HCl-HNO<sub>3</sub> solution (final concentration, different concentrations of HCl-1.0 M HNO<sub>3</sub>), and then 90  $\mu$ L of the resultant solution was injected into glass tubes containing  $1.0 \times 10^{-6}$  M luminal solution (dissolved in 0.1 M NaOH) for CL measurement.

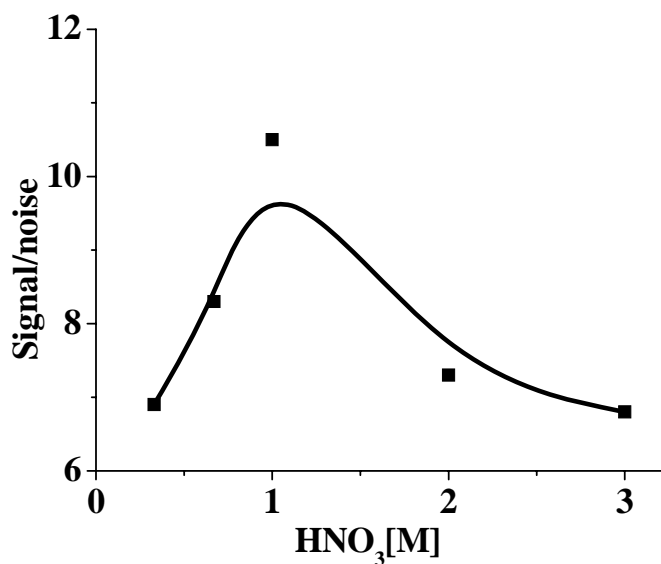

Fig.S2. Signal/noise ratio vs the concentration of HNO<sub>3</sub>. Experimental conditions: 50  $\mu$ L of  $2.32 \times 10^{-9}$  M gold nanoparticles (15 nm) was dissolved in 50  $\mu$ L of HCl-HNO<sub>3</sub> solution (final concentration, different concentrations of HNO<sub>3</sub>-3.0 M HCl), and then 90  $\mu$ L of the resultant solution was injected into glass tubes containing  $1.0 \times 10^{-6}$  M luminal solution (dissolved in 0.1 M NaOH) for CL measurement.

The conditions of gold dissolution with the use of HCl-NaCl-Br<sub>2</sub> have been studied. First, as the concentration of HCl increased, the signal/noise ratio increased between  $1.5 \times 10^{-3}$  M and  $1.2 \times 10^{-2}$  M, and then maintained almost the same in the range of  $1.2 \times 10^{-2}$  to  $1.0 \times 10^{-1}$  M HCl (Fig.S3). Hence, subsequent work employed  $5.0 \times 10^{-2}$  M HCl. Second, the signal/noise ratio increased when the concentration of NaCl was increased from  $3.7 \times 10^{-3}$  to  $1.5 \times 10^{-2}$  M, and then decreased quickly (Fig.S4). Thus,  $1.5 \times 10^{-2}$  M NaCl was selected for the following experiments. Third, the signal/noise ratio increased when the concentration of Br<sub>2</sub> was increased and reached its maximum at  $2.5 \times 10^{-4}$  M. In the other hand, the signal/noise ratio decreased with increasing the concentration of Br<sub>2</sub> when it was higher than  $2.5 \times 10^{-4}$  M (Fig.S5). Thus,  $2.5 \times 10^{-4}$  M Br<sub>2</sub> was chosen for the following experiments.

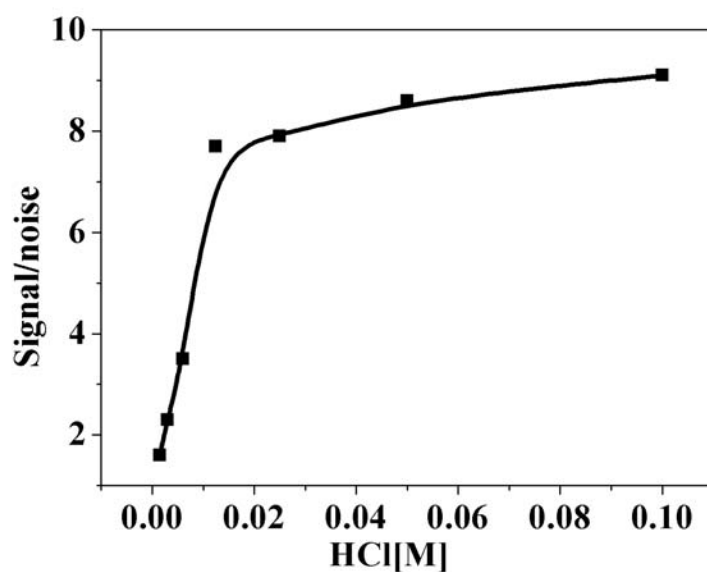

Fig.S3. Signal/noise ratio vs the concentration of HCl. Experimental conditions: 50  $\mu$ L of  $2.32 \times 10^{-9}$  M gold nanoparticles (15 nm) was dissolved in 50  $\mu$ L of HCl-NaCl-Br<sub>2</sub> solution (final concentration, different concentrations of HCl-0.5 M NaCl- $1.0 \times 10^{-4}$  M Br<sub>2</sub>), and then 90  $\mu$ L of the resultant solution was injected into glass tubes containing  $1.0 \times 10^{-6}$  M luminal solution (dissolved in 0.3 M NaOH) for CL measurement.

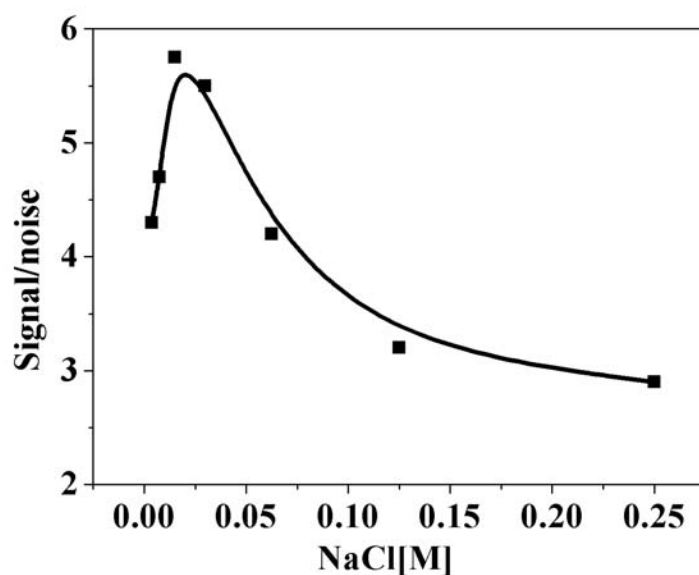

Fig.S4. Signal/noise ratio vs the concentration of NaCl. Experimental conditions: 50  $\mu\text{L}$  of  $2.32 \times 10^{-9}$  M gold nanoparticles (15 nm) was dissolved in 50  $\mu\text{L}$  of HCl-NaCl- $\text{Br}_2$  solution (final concentration,  $5.0 \times 10^{-2}$  M HCl-different concentrations of NaCl- $1.0 \times 10^{-4}$  M  $\text{Br}_2$ ), and then 90  $\mu\text{L}$  of the resultant solution injected into glass tubes containing  $1.0 \times 10^{-6}$  M luminal solution (dissolved in 0.3 M NaOH) for CL measurement.

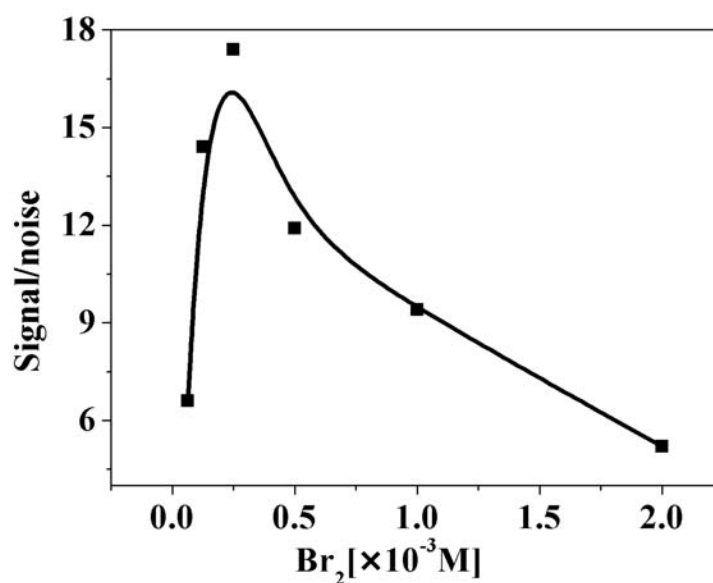

Fig.S5. Signal/noise ratio vs the concentration of  $\text{Br}_2$ . Experimental conditions: 50  $\mu\text{L}$  of  $2.32 \times$

$10^{-9}$  M gold nanoparticles (15 nm) was dissolved in 50  $\mu$ L of HCl-NaCl-Br<sub>2</sub> solution (final concentration,  $5 \times 10^{-2}$  M HCl- $1.5 \times 10^{-2}$  M NaCl -different concentrations of Br<sub>2</sub>), and then 90  $\mu$ L of the resultant solution was injected into glass tubes containing  $1.0 \times 10^{-6}$  M luminal solution (dissolved in 0.3 M NaOH) for CL measurement.

The conditions of gold dissolution with the use of other acid have been studied, which is shown in Fig.S6. The HCl-NaCl-Br<sub>2</sub> solution is proved to be more efficient than other solution, so we choose HCl-NaCl-Br<sub>2</sub> solution to dissolve gold nanoparticles.

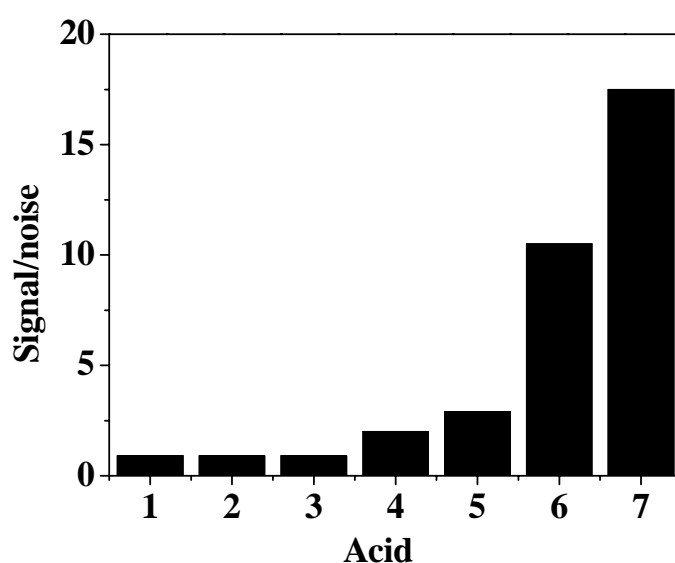

Fig.S6. Signal/noise ratio vs the kinds of acid. Experimental conditions: (1) 1M H<sub>2</sub>SO<sub>4</sub>; (2) 1M HNO<sub>3</sub>; (3)  $2.5 \times 10^{-4}$  Br<sub>2</sub>- $5.0 \times 10^{-2}$  M HBr; (4)  $2.5 \times 10^{-4}$  M Br<sub>2</sub>- $5.0 \times 10^{-2}$  M HCl; (5) 3M HCl; (6) 1M HNO<sub>3</sub>-3M HCl and (7)  $5.0 \times 10^{-2}$  M HCl- $1.5 \times 10^{-2}$  M NaCl- $2.5 \times 10^{-4}$  M Br<sub>2</sub>

#### CL reaction conditions

CLIA for detection of antibody against ApxIV is based on the catalytic effect of AuCl<sub>4</sub><sup>-</sup> to alkaline luminol solution (initiating the CLIA emission) reaction. Therefore, the effect of the concentration of NaOH on the CL intensity was investigated over the range of  $8.0 \times 10^{-3}$  to 2 M. It was found that CL intensity reached a maximum value when NaOH concentration was  $1.0 \times 10^{-1}$

M (Fig.S7). Thus,  $1.0 \times 10^{-1}$  M NaOH was selected for the following experiments. The effect of luminol concentration on the CL intensity was studied. The results showed that the CL signal/noise ratio increased between  $5.0 \times 10^{-9}$  M and  $5.0 \times 10^{-7}$  M with the increasing of luminol concentration, and then maintained almost the same in the range of  $5.0 \times 10^{-7}$  to  $2.0 \times 10^{-6}$  M luminol (Fig.S8). Hence,  $1.0 \times 10^{-6}$  M luminol was selected for subsequent work.

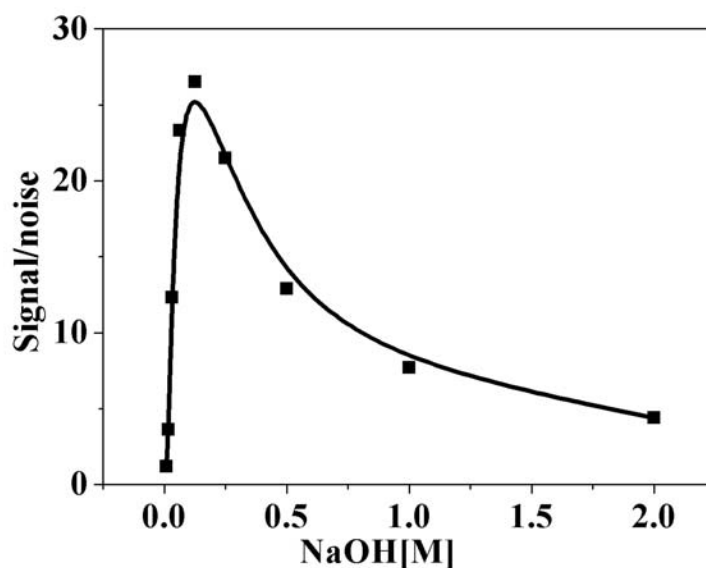

Fig.S7. Signal/noise ratio vs the concentration of NaOH. Experimental conditions: 50  $\mu$ L of  $2.32 \times 10^{-9}$  M gold nanoparticles (15 nm) was dissolved in 50  $\mu$ L of HCl-NaCl-Br<sub>2</sub> solution (final concentration,  $5.0 \times 10^{-2}$  M HCl- $1.5 \times 10^{-2}$  M NaCl- $2.5 \times 10^{-4}$  M Br<sub>2</sub>), and then 90  $\mu$ L of the resultant solution was injected into glass tubes containing  $1.0 \times 10^{-6}$  M luminol solution (dissolved in different concentration of NaOH) for CL measurement.

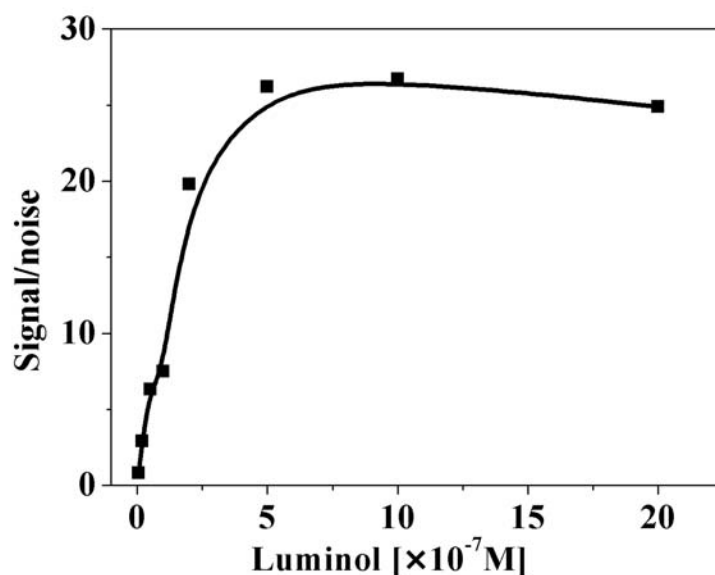

Fig.S8. Signal/noise ratio vs the concentration of luminol. Experimental conditions: 50  $\mu\text{L}$  of  $2.32 \times 10^{-9}$  M gold nanoparticles (15 nm) was dissolved in 50  $\mu\text{L}$  of HCl-NaCl- $\text{Br}_2$  solution (final concentration,  $5.0 \times 10^{-2}$  M HCl- $1.5 \times 10^{-2}$  M NaCl- $2.5 \times 10^{-4}$  M  $\text{Br}_2$ ), and then 90  $\mu\text{L}$  of the resultant solution was injected into glass tubes containing different concentrations of luminol (dissolved in 0.1 M NaOH) for CL measurement.
